# Supplementary material for: Effects of electron donating/withdrawing groups in the 5-substituted-2-hydroxybenzaldehyde on the synthesis of neutral cubanes with a NiII4O4core: synthesis, crystal structures and magnetic properties
Source: Royal Society of Chemistry journal article supplement (doi:10.1039/c5ra25969j), 2016-01-01
Supplement: c5ra25969j1.pdf [file c5ra25969j1.pdf]

## Supporting Information

### **Effects of electron donating/withdrawing groups in the 5-substituted-2-hydroxybenzaldehyde on the synthesis of neutral cubanes with a Ni<sup>II</sup><sub>4</sub>O<sub>4</sub> core: Synthesis, crystal structures and magnetic properties**

Hadi Amiri Rudbari,<sup>\*a</sup> Francisco Lloret,<sup>\*b</sup> Mahsa Khorshidifard,<sup>a</sup> Giuseppe Bruno<sup>c</sup> and Miguel Julve<sup>b</sup>

<sup>a</sup> Department of Chemistry, University of Isfahan, Isfahan 81746-73441, Iran.

<sup>b</sup> Departament de Química Inorgànica/Institut de Ciència Molecular (ICMol), Universitat de València, C/ Catedràtic José Beltran 2, 46980 Paterna, València, Spain.

<sup>c</sup> Department of Chemical Sciences, University of Messina, Via F. Stagno d'Alcontres 31, 98166 Messina, Italy.

**Table S1** Selected bond lengths (Å) and angles (°) for **1** and **2**

|                  | <b>1</b>   | <b>2</b>   |
|------------------|------------|------------|
| Ni(1)-O(1)       | 2.074(2)   | 2.0637(18) |
| Ni(1)-O(2)       | 2.063(2)   | 2.062(2)   |
| Ni(1)-O(3)       | 2.051(2)   | 2.0417(19) |
| Ni(2)-O(1)       | 2.055(2)   | 2.0474(19) |
| Ni(2)-O(2)       | 2.052(2)   | 2.0594(19) |
| Ni(2)-O(4)       | 2.062(2)   | 2.054(2)   |
| Ni(3)-O(1)       | 2.056(2)   | 2.053(2)   |
| Ni(3)-O(3)       | 2.054(2)   | 2.0532(18) |
| Ni(3)-O(4)       | 2.069(2)   | 2.0521(18) |
| Ni(4)-O(2)       | 2.0474(19) | 2.051(2)   |
| Ni(4)-O(3)       | 2.056(2)   | 2.0574(19) |
| Ni(4)-O(4)       | 2.084(2)   | 2.0619(18) |
| Ni(2)-O(1)-Ni(1) | 95.32(8)   | 95.96(8)   |
| Ni(1)-O(3)-Ni(3) | 95.84(8)   | 96.30(7)   |
| Ni(2)-O(2)-Ni(1) | 95.78(8)   | 95.65(8)   |
| Ni(2)-O(1)-Ni(3) | 100.18(9)  | 99.60(8)   |
| Ni(2)-O(4)-Ni(3) | 99.52(9)   | 99.41(8)   |
| Ni(2)-O(4)-Ni(4) | 95.04(8)   | 96.44(7)   |
| Ni(3)-O(1)-Ni(1) | 95.06(8)   | 95.61(7)   |
| Ni(3)-O(3)-Ni(4) | 96.67(9)   | 95.99(8)   |
| Ni(3)-O(4)-Ni(4) | 95.32(9)   | 95.89(8)   |
| Ni(4)-O(2)-Ni(2) | 96.47(9)   | 96.64(8)   |
| Ni(4)-O(2)-Ni(1) | 98.91(8)   | 98.79(8)   |
| Ni(1)-O(3)-Ni(4) | 99.02(8)   | 99.22(8)   |
| Ni(1)-Ni(2)      | 3.0526     | 3.0542     |
| Ni(1)-Ni(3)      | 3.0466     | 3.0503     |
| Ni(1)-Ni(4)      | 3.1233     | 3.1222     |
| Ni(2)-Ni(3)      | 3.1534     | 3.1323     |
| Ni(2)-Ni(4)      | 3.0574     | 3.0697     |
| Ni(3)-Ni(4)      | 3.0698     | 3.0547     |

**Table S2** Crystal data and structure refinement for **1** and **2**.

|                                                  | <b>1</b>                                                         | <b>2</b>                                                        |
|--------------------------------------------------|------------------------------------------------------------------|-----------------------------------------------------------------|
| Empirical formula                                | C <sub>36</sub> H <sub>48</sub> O <sub>16</sub> Ni <sub>4</sub>  | C <sub>40</sub> H <sub>56</sub> O <sub>16</sub> Ni <sub>4</sub> |
| Formula weight                                   | 971.58                                                           | 1027.69                                                         |
| Temperature (K)                                  | 298(2)                                                           | 298(2)                                                          |
| Wavelength (Å)                                   | 0.71073                                                          | 0.71073                                                         |
| Crystal system                                   | Monoclinic                                                       | Monoclinic                                                      |
| Space group                                      | P2(1)/n                                                          | P2(1)/c                                                         |
| Unit cell dimensions (Å, °)                      | a = 14.645(3)<br>b = 14.608(3)<br>c = 20.215(4)<br>β = 104.39(3) | a = 18.262(4)<br>b = 17.467(4)<br>c = 14.722(3)<br>β = 90.39(3) |
| Volume (Å <sup>3</sup> )                         | 4189.0(16)                                                       | 4695.8(18)                                                      |
| Z                                                | 4                                                                | 4                                                               |
| Calculated density (Mg/m <sup>3</sup> )          | 1.541                                                            | 1.454                                                           |
| Absorption coefficient (mm <sup>-1</sup> )       | 1.838                                                            | 1.644                                                           |
| F(000)                                           | 2016                                                             | 2144                                                            |
| Theta range for data collection (°)              | 2.62 to 25.00                                                    | 2.52 to 26.00                                                   |
| Index ranges                                     | -17 ≤ h ≤ 17<br>-17 ≤ k ≤ 17<br>-23 ≤ l ≤ 24                     | -21 ≤ h ≤ 22<br>-21 ≤ k ≤ 21<br>-18 ≤ l ≤ 18                    |
| Reflections collected                            | 20745                                                            | 44189                                                           |
| Independent reflections                          | 7077 [R <sub>(int)</sub> = 0.0348]                               | 9210 [R <sub>(int)</sub> = 0.0452]                              |
| Data Completeness (%)                            | 96.1                                                             | 99.9                                                            |
| Refinement method                                | Full-matrix least-squares on <i>F</i> <sup>2</sup>               | Full-matrix least-squares on <i>F</i> <sup>2</sup>              |
| Data / restraints / parameters                   | 7077 / 9 / 519                                                   | 9210 / 12 / 557                                                 |
| Goodness-of-fit on <i>F</i> <sup>2</sup>         | 0.858                                                            | 0.920                                                           |
| Final R indices [I > 2σ (I)]                     | R <sub>1</sub> = 0.0311<br>wR <sub>2</sub> = 0.0624              | R <sub>1</sub> = 0.0358<br>wR <sub>2</sub> = 0.0844             |
| R indices (all data)                             | R <sub>1</sub> = 0.0536<br>wR <sub>2</sub> = 0.0669              | R <sub>1</sub> = 0.0571<br>wR <sub>2</sub> = 0.0906             |
| Largest diff. peak and hole (e.Å <sup>-3</sup> ) | 0.395 and -0.249                                                 | 0.251 and -0.269                                                |
